# Supplementary material
Source: MDPI journal article supplement (https://www.mdpi.com/2073-4344/12/10/1079)
Supplement: s1 [file s1]

# Highly Active Rutile TiO<sub>2</sub> for Photocatalysis under Violet Light Irradiation at 405 nm

**Fumiaki Amano<sup>1,\*</sup>, Akira Yamamoto<sup>2</sup>, and Jun Kumagai<sup>3</sup>**

<sup>1</sup> Department of Applied Chemistry for Environment, Graduate School of Urban Environmental Sciences, Tokyo Metropolitan University, 1-1 Minami-osawa, Hachioji, Tokyo 192-0397, Japan

<sup>2</sup> Department of Interdisciplinary Environment, Graduate School of Human and Environmental Studies, Kyoto University, Yoshida-nihonmatsu-cho, Sakyo-ku, Kyoto 606-8501, Japan

<sup>3</sup> Institute of Materials and Systems for Sustainability, Division of Materials Research, Nagoya University, Furo-cho, Chikusa-ku, Nagoya 464-8603, Japan

Corresponding Author: \*Fumiaki Amano

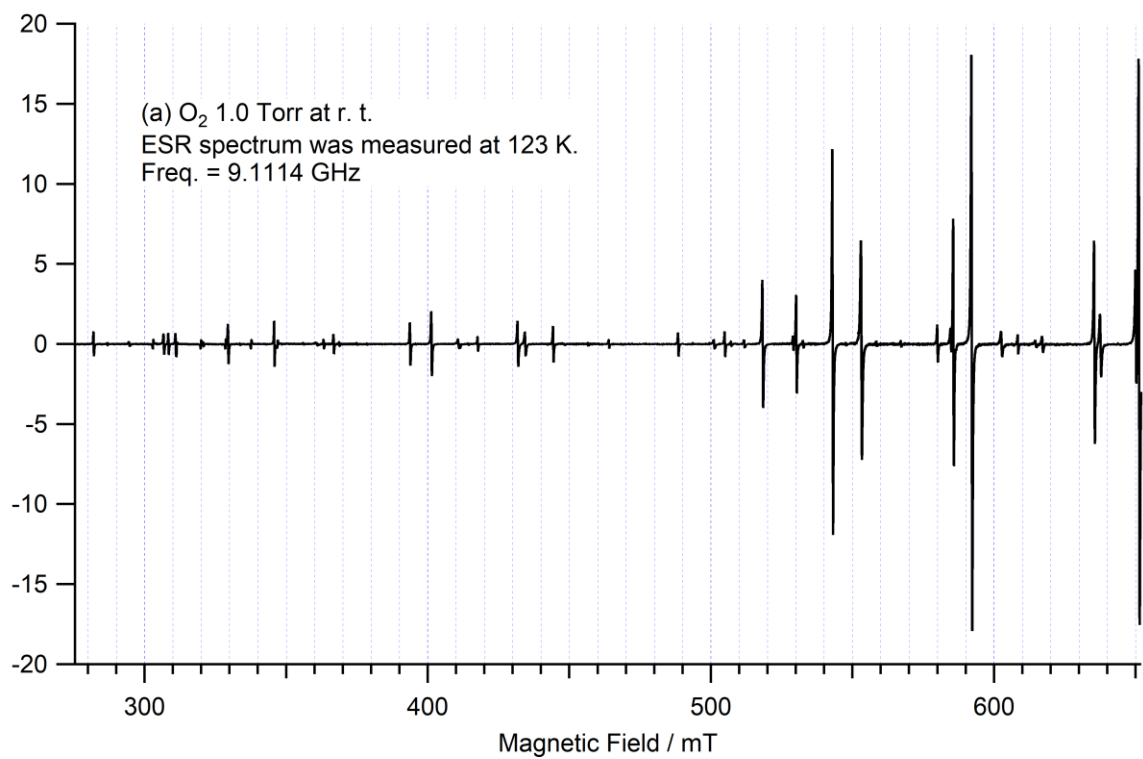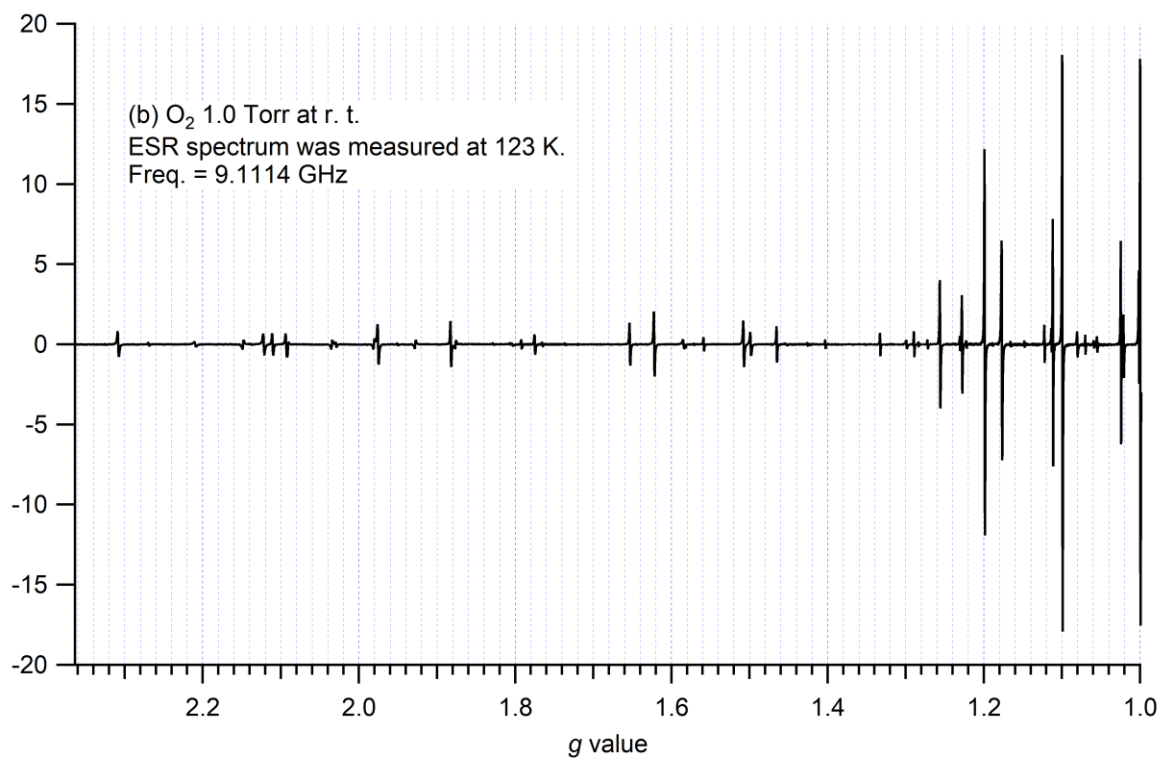

**Figure S1.** ESR spectrum of pure  $O_2$  recorded at  $-150\text{ }^{\circ}\text{C}$ : (a) Magnetic field and (b)  $g$  value.
